# Supplementary material
Source: publisher figshare collection journal article supplement (https://springernature.figshare.com/ndownloader/files/16268384)
Supplement: Supplementary file [file 16268384]

# **Stochastic modeling of aging cells reveals how damage accumulation, repair, and cell-division asymmetry affect clonal senescence and population fitness**

**Ruijie Song<sup>1,2</sup> and Murat Acar<sup>1,2,3,4,\*</sup>**

<sup>1</sup> Systems Biology Institute, Yale University  
850 West Campus Drive, West Haven, CT 06516

<sup>2</sup> Interdepartmental Program in Computational Biology and Bioinformatics, Yale University  
300 George Street, Suite 501, New Haven, CT 06511

<sup>3</sup> Department of Molecular Cellular and Developmental Biology, Yale University  
219 Prospect Street, New Haven, CT 06511

<sup>4</sup> Department of Physics, Yale University  
217 Prospect Street, New Haven, CT 06511

\* To whom correspondence should be addressed: [murat.acar@yale.edu](mailto:murat.acar@yale.edu)

## **SUPPLEMENTARY INFORMATION**

**Supplementary Figures S1-S4**

**Supplementary Tables S1-S2**

## SUPPLEMENTARY FIGURES

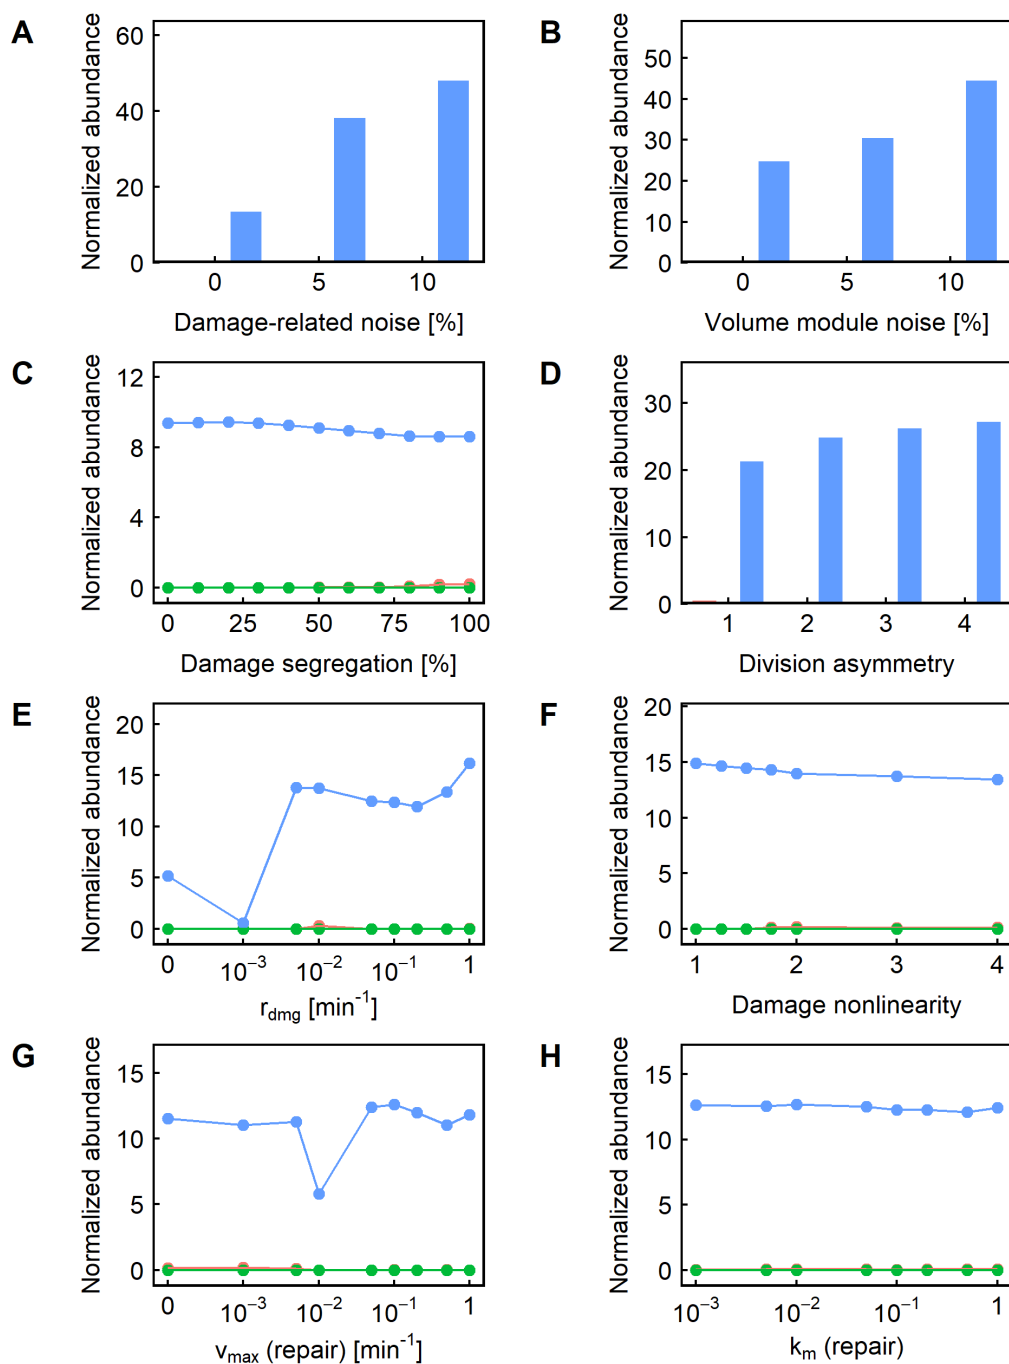

**Fig. S1. A-H.** Relative representation of the other parameters in the cases where changing the level of inheritance caused a significant (>5%) fitness difference. In each panel, the color indicates the level of inheritance resulting in maximum fitness: red indicates that no inheritance ( $c = 0\%$ ) is the most fit; blue indicates that maximum inheritance ( $c = 90\%$ ) is the most fit; and green indicates that an intermediate level of inheritance is the most fit.

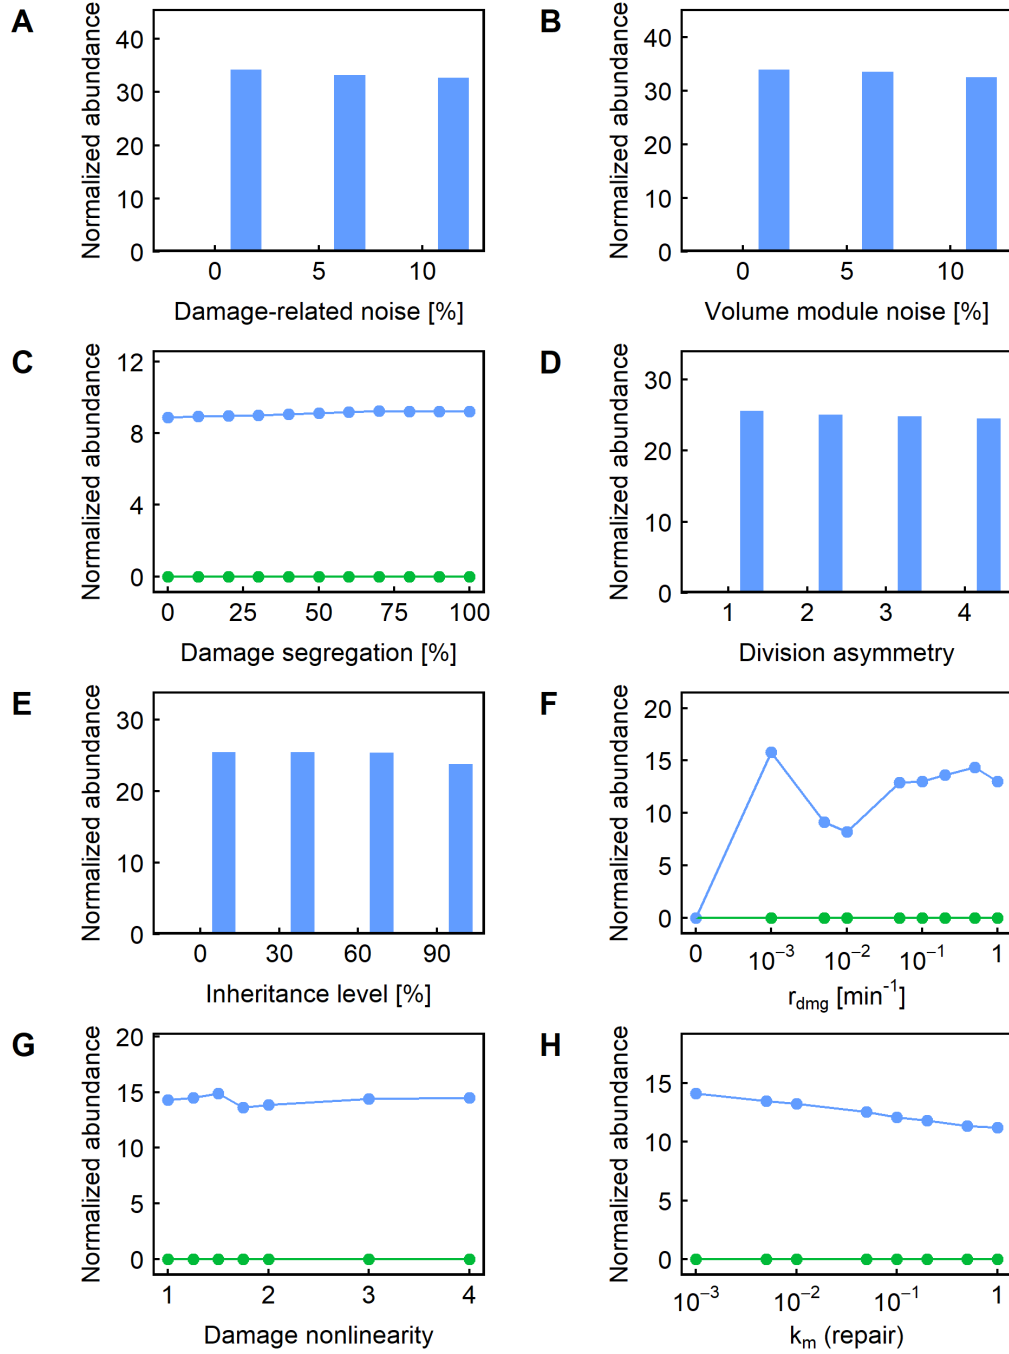

**Fig. S2. A-H.** Relative representation of the other parameters in the cases where changing the maximum repair rate caused a significant ( $>5\%$ ) fitness difference. In each panel, the color indicates the level of repair resulting in maximum fitness: red indicates that no repair is the most fit; blue indicates that maximum repair ( $v_{\text{max}} = 1 \text{ min}^{-1}$ ) is the most fit; and green indicates that an intermediate rate of repair is the most fit.

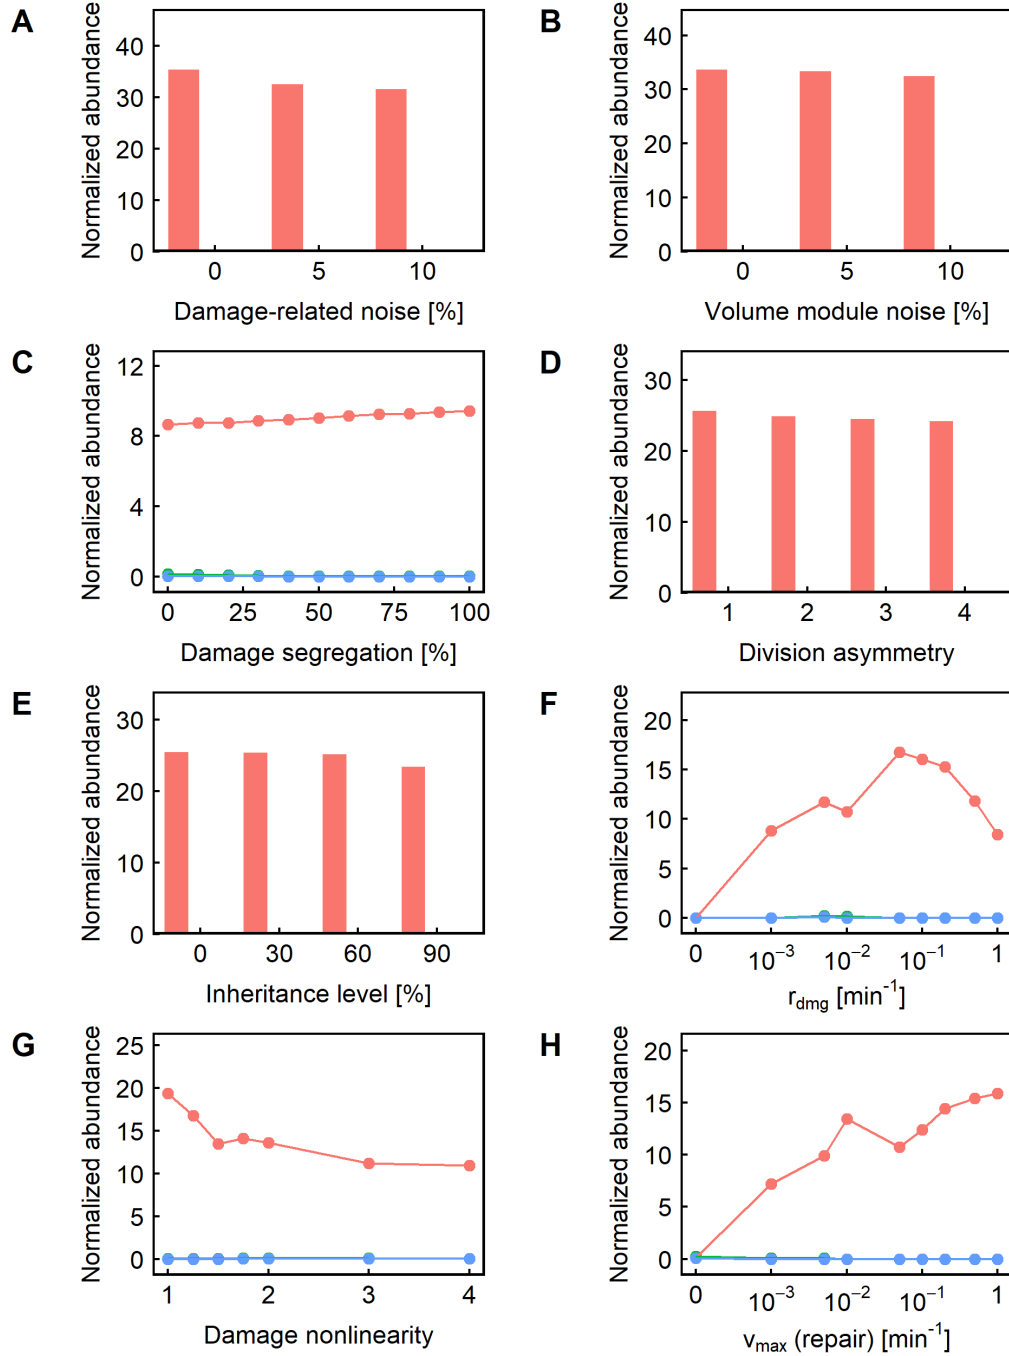

**Fig. S3. A-H.** Relative representation of the other parameters in the cases where changing the Michaelis constant  $k_m$  for repair caused a significant ( $>5\%$ ) fitness difference. In each panel, the color indicates the value of  $k_m$  resulting in maximum fitness: red indicates that the minimum value  $k_m = 0.001$  is the most fit; blue indicates that maximum  $k_m$  ( $k_m = 1$ ) is the most fit; and green indicates that an intermediate value of  $k_m$  is the most fit.

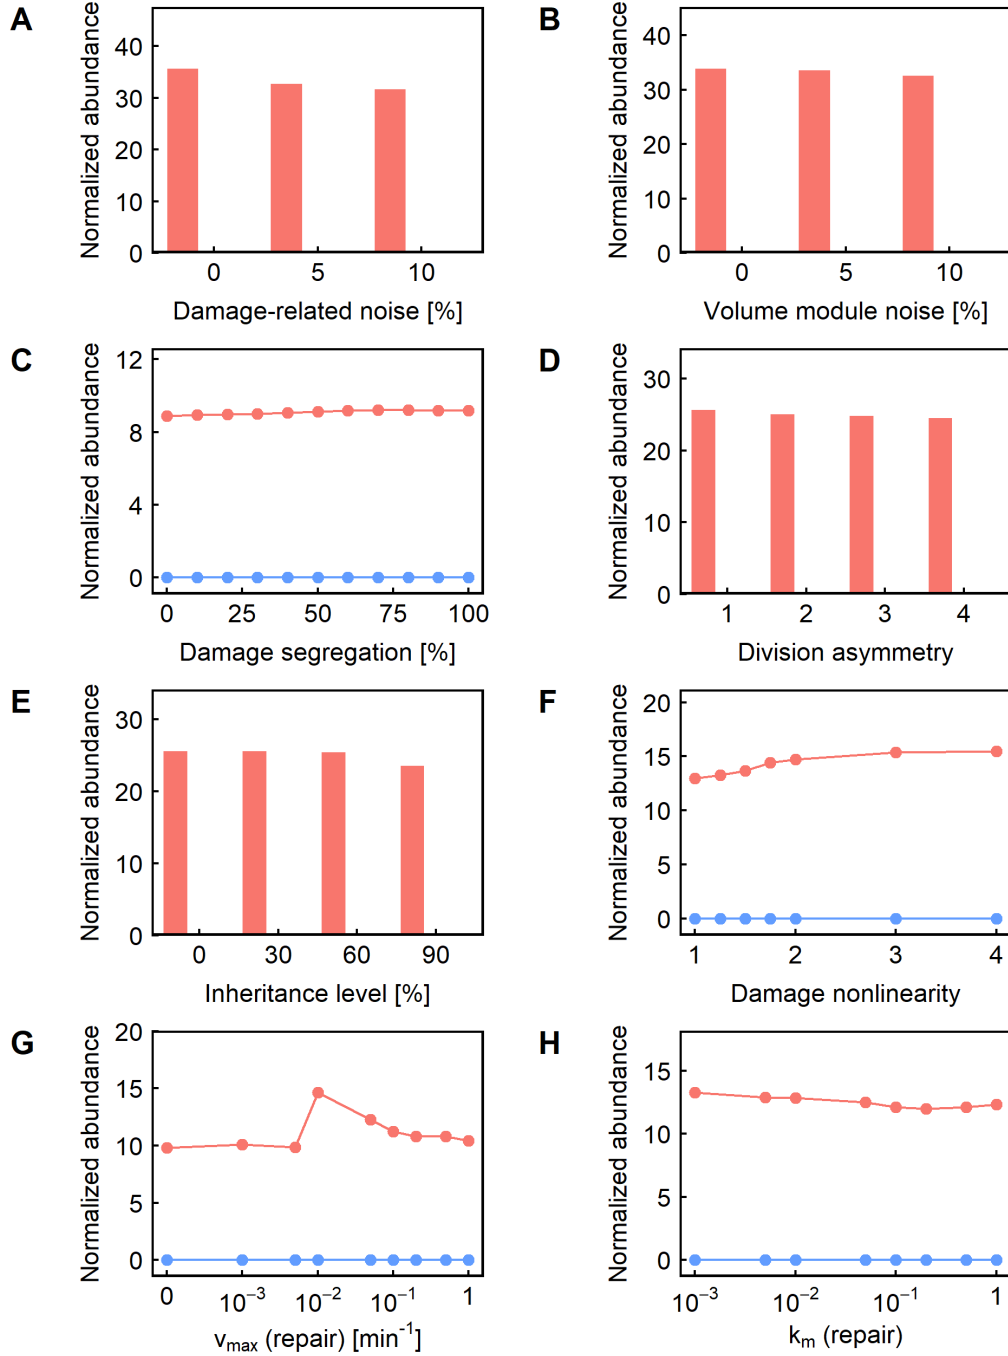

**Fig. S4. A-H.** Relative representation of the other parameters in the cases where changing the damage accumulation rate caused a significant ( $>5\%$ ) fitness difference. In each panel, the color indicates the damage accumulation rate resulting in maximum fitness: red indicates that no damage accumulation is the most fit; blue indicates that maximum damage accumulation ( $r_{\text{dmg}} = 1 \text{ min}^{-1}$ ) is the most fit; and green indicates that an intermediate rate of damage accumulation is the most fit.

## SUPPLEMENTARY TABLES

| Parameter    | Meaning                                          | Value            | Unit              |
|--------------|--------------------------------------------------|------------------|-------------------|
| $r_{growth}$ | Volume growth rate constant                      | 0.0072           | $\text{min}^{-1}$ |
| $V_i$        | Initial volume                                   | 50               | fL                |
| $V_{crit}$   | Critical volume (as function of generation $g$ ) | $106.7 + 4.628g$ | fL                |

**Table S1. Parameters with fixed mean values.**

| Parameter | Meaning                                             | Values                                        | Unit              |
|-----------|-----------------------------------------------------|-----------------------------------------------|-------------------|
| $c$       | Level of inheritance of parameter values            | 0, 30, 60, 90                                 | %                 |
| $R$       | Mother/daughter volume ratio at division            | 1, 2, 3, 4                                    |                   |
| $n_d$     | Damage-related noise                                | 0, 5, 10                                      | %                 |
| $n_v$     | Volume module noise                                 | 0, 5, 10                                      | %                 |
| $s$       | Level of damage segregation                         | 0, 10, 20, 30, 40, 50, 60, 70, 80, 90, 100    | %                 |
| $v_{max}$ | Maximum rate of repair                              | 0, 0.001, 0.005, 0.01, 0.05, 0.1, 0.2, 0.5, 1 | $\text{min}^{-1}$ |
| $k_m$     | Michelis constant for repair                        | 0.001, 0.005, 0.01, 0.05, 0.1, 0.2, 0.5, 1    |                   |
| $r_{dmg}$ | Rate of damage accumulation                         | 0, 0.001, 0.005, 0.01, 0.05, 0.1, 0.2, 0.5, 1 | $\text{min}^{-1}$ |
| $\alpha$  | Nonlinearity of the effect of damage on growth rate | 1, 1.25, 1.5, 1.75, 2, 3, 4                   |                   |

**Table S2. Parameters with values selected from a grid of values.**
